# Supplementary material for: Predicting host taxonomic information from viral genomes: A comparison of feature representations
Source: PLoS Comput Biol. 2020 May 26;16(5):e1007894. doi: 10.1371/journal.pcbi.1007894 (PMC7307784; doi:10.1371/journal.pcbi.1007894)
Supplement: S1 Table — (CSV) [file pcbi.1007894.s001.csv]

label	tax	pool_label	pool_tax	Baltimore	N
Bacteroidetes	phylum	Bacteria	superkingdom	dsDNA	92
Cyanobacteria	phylum	Bacteria	superkingdom	dsDNA	208
Actinobacteria	phylum	Bacteria	superkingdom	dsDNA	993
Firmicutes	phylum	Bacteria	superkingdom	dsDNA	990
Proteobacteria	phylum	Bacteria	superkingdom	dsDNA	985
Clostridia	class	Firmicutes	phylum	dsDNA	92
Bacilli	class	Firmicutes	phylum	dsDNA	93
Alphaproteobacteria	class	Proteobacteria	phylum	dsDNA	145
Betaproteobacteria	class	Proteobacteria	phylum	dsDNA	152
Gammaproteobacteria	class	Proteobacteria	phylum	dsDNA	348
Synechococcales	order	Bacteria	superkingdom	dsDNA	193
Corynebacteriales	order	Actinobacteria	class	dsDNA	246
Clostridiales	order	Firmicutes	phylum	dsDNA	90
Lactobacillales	order	Bacilli	class	dsDNA	547
Rhizobiales	order	Alphaproteobacteria	class	dsDNA	72
Burkholderiales	order	Proteobacteria	phylum	dsDNA	152
Bacillales	order	Bacilli	class	dsDNA	547
Enterobacterales	order	Gammaproteobacteria	class	dsDNA	771
Pseudomonadales	order	Gammaproteobacteria	class	dsDNA	402
Burkholderiaceae	family	Proteobacteria	phylum	dsDNA	124
Streptococcaceae	family	Lactobacillales	order	dsDNA	191
Erwiniaceae	family	Enterobacterales	order	dsDNA	56
Enterobacteriaceae	family	Enterobacterales	order	dsDNA	250
Lactobacillaceae	family	Lactobacillales	order	dsDNA	88
Flavobacteriaceae	family	Bacteria	superkingdom	dsDNA	82
Mycobacteriaceae	family	Corynebacteriales	order	dsDNA	176
Listeriaceae	family	Bacillales	order	dsDNA	72
Propionibacteriaceae	family	Actinobacteria	class	dsDNA	166
Vibrionaceae	family	Gammaproteobacteria	class	dsDNA	198
Bacillaceae	family	Bacillales	order	dsDNA	259
Moraxellaceae	family	Pseudomonadales	order	dsDNA	61
Klebsiella	genus	Enterobacteriaceae	family	dsDNA	69
Gordonia	genus	Corynebacteriales	order	dsDNA	138
Acinetobacter	genus	Pseudomonadales	order	dsDNA	60
Propionibacterium	genus	Actinobacteria	class	dsDNA	122
Mycobacterium	genus	Mycobacteriaceae	family	dsDNA	262
Mycolicibacterium	genus	Corynebacteriales	order	dsDNA	210
Escherichia	genus	Enterobacteriaceae	family	dsDNA	435
Prochlorococcus	genus	Synechococcales	order	dsDNA	56
Salmonella	genus	Enterobacteriaceae	family	dsDNA	220
Cellulophaga	genus	Bacteria	superkingdom	dsDNA	56
Clostridium	genus	Firmicutes	phylum	dsDNA	84
Enterococcus	genus	Lactobacillales	order	dsDNA	67
Lactococcus	genus	Streptococcaceae	family	dsDNA	150
Vibrio	genus	Gammaproteobacteria	class	dsDNA	195
Streptococcus	genus	Streptococcaceae	family	dsDNA	150
Lactobacillus	genus	Lactobacillales	order	dsDNA	85
Staphylococcus	genus	Bacillales	order	dsDNA	264
Listeria	genus	Bacillales	order	dsDNA	66
Burkholderia	genus	Burkholderiales	order	dsDNA	74
Bacillus	genus	Bacillales	order	dsDNA	247
Pseudomonas	genus	Pseudomonadales	order	dsDNA	60
Enterococcus faecalis	species	Lactobacillales	order	dsDNA	57
Vibrio cholerae	species	Vibrio	genus	dsDNA	97
Escherichia coli	species	Enterobacteriaceae	family	dsDNA	465
Synechococcus sp. WH 7803	species	Synechococcus	genus	dsDNA	60
Bacillus thuringiensis	species	Bacillus	genus	dsDNA	79
Listeria monocytogenes	species	Bacillales	order	dsDNA	62
Cutibacterium acnes	species	Actinobacteria	class	dsDNA	160
Gordonia terrae	species	Corynebacteriales	order	dsDNA	110
Staphylococcus aureus	species	Bacillales	order	dsDNA	215
Mycolicibacterium smegmatis	species	Corynebacteriales	order	dsDNA	212
Lactococcus lactis	species	Streptococcaceae	family	dsDNA	168
Bacillus cereus	species	Bacillus	genus	dsDNA	66
Salmonella enterica	species	Enterobacteriaceae	family	dsDNA	192
