# Supplementary material for: Predicting host taxonomic information from viral genomes: A comparison of feature representations
Source: PLoS Comput Biol. 2020 May 26;16(5):e1007894. doi: 10.1371/journal.pcbi.1007894 (PMC7307784; doi:10.1371/journal.pcbi.1007894)
Supplement: S2 Table — (CSV) [file pcbi.1007894.s002.csv]

label	tax	pool_label	pool_tax	Baltimore	N
Metazoa	kingdom	Eukaryota	superkingdom	dsDNA	120
Fungi	kingdom	Eukaryota	superkingdom	(+)ssRNA	104
Fungi	kingdom	Eukaryota	superkingdom	dsRNA	142
Viridiplantae	kingdom	Eukaryota	superkingdom	(+)ssRNA	1451
Viridiplantae	kingdom	Eukaryota	superkingdom	dsRNA	57
Viridiplantae	kingdom	Eukaryota	superkingdom	(-)ssRNA	92
Metazoa	kingdom	Eukaryota	superkingdom	(-)ssRNA	88
Metazoa	kingdom	Eukaryota	superkingdom	(+)ssRNA	1562
Metazoa	kingdom	Eukaryota	superkingdom	dsRNA	89
Metazoa	kingdom	Eukaryota	superkingdom	ssDNA	1197
Viridiplantae	kingdom	Eukaryota	superkingdom	ssDNA	1200
Streptophyta	phylum	Eukaryota	superkingdom	(+)ssRNA	1449
Chordata	phylum	Metazoa	kingdom	RNA	716
Mollusca	phylum	Metazoa	kingdom	all	95
Arthropoda	phylum	Metazoa	kingdom	all	883
Chordata	phylum	Metazoa	kingdom	all	896
Streptophyta	phylum	Eukaryota	superkingdom	(-)ssRNA	90
Streptophyta	phylum	Eukaryota	superkingdom	dsRNA	65
Arthropoda	phylum	Metazoa	kingdom	RNA	816
Arthropoda	phylum	Eukaryota	superkingdom	(+)ssRNA	437
Arthropoda	phylum	Eukaryota	superkingdom	ssDNA	247
Arthropoda	phylum	Eukaryota	superkingdom	dsDNA	249
Chordata	phylum	Eukaryota	superkingdom	(+)ssRNA	1957
Chordata	phylum	Eukaryota	superkingdom	ssDNA	850
Chordata	phylum	Eukaryota	superkingdom	(-)ssRNA	362
Chordata	phylum	Eukaryota	superkingdom	dsDNA	369
Streptophyta	phylum	Eukaryota	superkingdom	ssDNA	1203
Bivalvia	class	Metazoa	kingdom	all	66
Arachnida	class	Arthropoda	phylum	(-)ssRNA	72
Arachnida	class	Arthropoda	phylum	RNA	103
Arachnida	class	Arthropoda	phylum	all	114
Mammalia	class	Chordata	phylum	RNA	425
Aves	class	Chordata	phylum	RNA	343
Insecta	class	Arthropoda	phylum	all	215
Aves	class	Chordata	phylum	all	575
Mammalia	class	Chordata	phylum	all	771
Insecta	class	Arthropoda	phylum	RNA	133
Insecta	class	Metazoa	kingdom	(-)ssRNA	233
Insecta	class	Metazoa	kingdom	(+)ssRNA	379
Mammalia	class	Metazoa	kingdom	dsDNA	467
Insecta	class	Metazoa	kingdom	ssDNA	175
Insecta	class	Metazoa	kingdom	dsDNA	235
Mammalia	class	Metazoa	kingdom	ssDNA	440
Mammalia	class	Metazoa	kingdom	(+)ssRNA	615
Mammalia	class	Metazoa	kingdom	(-)ssRNA	395
Lepidoptera	order	Insecta	class	all	273
Hymenoptera	order	Insecta	class	all	91
Passeriformes	order	Aves	class	all	103
Ixodida	order	Arthropoda	phylum	all	105
Rodentia	order	Mammalia	class	all	614
Diptera	order	Insecta	class	all	464
Hemiptera	order	Insecta	class	all	114
Carnivora	order	Mammalia	class	RNA	166
Decapoda	order	Arthropoda	phylum	all	60
Chiroptera	order	Mammalia	class	RNA	297
Perissodactyla	order	Mammalia	class	RNA	56
Primates	order	Mammalia	class	RNA	1303
Rodentia	order	Mammalia	class	RNA	473
Galliformes	order	Aves	class	RNA	122
Hymenoptera	order	Insecta	class	RNA	65
Diptera	order	Insecta	class	RNA	232
Lepidoptera	order	Insecta	class	RNA	61
Hemiptera	order	Insecta	class	RNA	82
Ixodida	order	Arthropoda	phylum	RNA	90
Odonata	order	Insecta	class	all	87
Primates	order	Mammalia	class	all	906
Galliformes	order	Aves	class	all	212
Primates	order	Mammalia	class	(+)ssRNA	914
Chiroptera	order	Mammalia	class	(-)ssRNA	88
Primates	order	Mammalia	class	(-)ssRNA	218
Rodentia	order	Mammalia	class	(+)ssRNA	269
Chiroptera	order	Mammalia	class	(+)ssRNA	197
Rodentia	order	Mammalia	class	dsDNA	107
Carnivora	order	Mammalia	class	(+)ssRNA	117
Chiroptera	order	Mammalia	class	ssDNA	101
Carnivora	order	Mammalia	class	dsDNA	118
Carnivora	order	Mammalia	class	ssDNA	94
Carnivora	order	Mammalia	class	all	392
Chiroptera	order	Mammalia	class	all	509
Chiroptera	order	Mammalia	class	dsDNA	106
Rodentia	order	Mammalia	class	dsDNA	110
Primates	order	Mammalia	class	dsDNA	578
Rodentia	order	Mammalia	class	(-)ssRNA	134
Primates	order	Mammalia	class	ssDNA	256
Perissodactyla	order	Mammalia	class	all	99
Bovidae	family	Mammalia	class	RNA	258
Suidae	family	Mammalia	class	all	336
Suidae	family	Mammalia	class	RNA	195
Vespertilionidae	family	Chiroptera	order	all	130
Phyllostomidae	family	Chiroptera	order	all	77
Pteropodidae	family	Chiroptera	order	RNA	80
Equidae	family	Mammalia	class	RNA	57
Felidae	family	Carnivora	order	RNA	77
Anatidae	family	Aves	class	RNA	88
Hominidae	family	Primates	order	RNA	134
Cercopithecidae	family	Primates	order	RNA	177
Muridae	family	Rodentia	order	RNA	147
Cricetidae	family	Rodentia	order	RNA	130
Vespertilionidae	family	Chiroptera	order	RNA	71
Noctuidae	family	Lepidoptera	order	all	96
Phasianidae	family	Aves	class	RNA	107
Cricetidae	family	Rodentia	order	all	155
Muridae	family	Rodentia	order	all	197
Canidae	family	Carnivora	order	all	106
Phasianidae	family	Aves	class	all	193
Anatidae	family	Aves	class	all	127
Equidae	family	Mammalia	class	all	100
Cercopithecidae	family	Primates	order	all	349
Ixodidae	family	Arthropoda	phylum	RNA	72
Ixodidae	family	Arthropoda	phylum	all	72
Hominidae	family	Primates	order	all	341
Culicidae	family	Diptera	order	all	134
Culicidae	family	Diptera	order	RNA	124
Felidae	family	Carnivora	order	all	124
Chlorocebus	genus	Cercopithecidae	family	all	138
Mus	genus	Muridae	family	RNA	97
Homo	genus	Primates	order	RNA	153
Rattus	genus	Muridae	family	RNA	58
Macaca	genus	Cercopithecidae	family	all	174
Chlorocebus	genus	Cercopithecidae	family	RNA	84
Homo	genus	Hominidae	family	all	80
Anas	genus	Aves	class	RNA	59
Macaca	genus	Cercopithecidae	family	RNA	56
Mus	genus	Muridae	family	all	146
Rhinolophus	genus	Chiroptera	order	all	67
Felis	genus	Carnivora	order	RNA	69
Pteropus	genus	Pteropodidae	family	all	58
Felis	genus	Carnivora	order	all	105
Anas	genus	Aves	class	all	76
Pan	genus	Hominidae	family	all	92
Equus	genus	Mammalia	class	all	97
Bos	genus	Bovidae	family	RNA	65
Bos	genus	Bovidae	family	all	100
Aedes	genus	Culicidae	family	RNA	80
Culex	genus	Culicidae	family	RNA	129
Aedes	genus	Culicidae	family	all	93
Culex	genus	Culicidae	family	all	136
Rattus	genus	Muridae	family	all	96
Homo sapiens	species	Hominidae	family	all	79
Bos taurus	species	Bovidae	family	RNA	72
Mus musculus	species	Muridae	family	RNA	115
Macaca mulatta	species	Macaca	genus	all	73
Chlorocebus aethiops	species	Cercopithecidae	family	all	122
Mus musculus	species	Muridae	family	all	168
Felis catus	species	Carnivora	order	all	105
Gallus gallus	species	Galliformes	order	all	68
Canis lupus	species	Carnivora	order	all	97
Gallus gallus	species	Aves	class	RNA	84
Equus caballus	species	Mammalia	class	all	84
Ovis aries	species	Bovidae	family	all	75
Bos taurus	species	Bovidae	family	all	114
Sus scrofa	species	Mammalia	class	RNA	189
Felis catus	species	Carnivora	order	RNA	70
Homo sapiens	species	Primates	order	RNA	156
Chlorocebus aethiops	species	Cercopithecidae	family	RNA	78
Sus scrofa	species	Mammalia	class	all	336
Rattus norvegicus	species	Muridae	family	all	80
