# Supplementary material for: Predicting host taxonomic information from viral genomes: A comparison of feature representations
Source: PLoS Comput Biol. 2020 May 26;16(5):e1007894. doi: 10.1371/journal.pcbi.1007894 (PMC7307784; doi:10.1371/journal.pcbi.1007894)
Supplement: S6 Table — (CSV) [file pcbi.1007894.s006.csv]

label	tax	pool_label	pool_tax	holdout	Baltimore	N	features	k	AUC	Spec	Sens
Bacillaceae	family	Bacillales	order	none	DNA	259	DNA	2	0.827	0.85	0.69
Bacillaceae	family	Bacillales	order	none	DNA	259	DNA	6	0.995	0.94	1
Bacillaceae	family	Bacillales	order	none	DNA	259	DNA	9	0.922	0.85	1
Bacillaceae	family	Bacillales	order	none	DNA	259	AA	3	0.974	0.85	1
Bacillaceae	family	Bacillales	order	none	DNA	259	AA	4	0.988	0.79	1
Bacillaceae	family	Bacillales	order	none	DNA	259	PC	5	0.966	0.79	1
Bacillaceae	family	Bacillales	order	none	DNA	259	PC	6	0.986	0.79	1
Bacillaceae	family	Bacillales	order	none	DNA	259	Domains	0	0.997	0.97	0.97
Bacillaceae	family	Bacillales	order	Siphoviridae	DNA	156	DNA	2	0.848	0	1
Bacillaceae	family	Bacillales	order	Siphoviridae	DNA	156	DNA	6	0.822	0.75	0.75
Bacillaceae	family	Bacillales	order	Siphoviridae	DNA	156	DNA	9	0.855	0	1
Bacillaceae	family	Bacillales	order	Siphoviridae	DNA	156	AA	3	0.932	0	1
Bacillaceae	family	Bacillales	order	Siphoviridae	DNA	156	AA	4	0.915	0	1
Bacillaceae	family	Bacillales	order	Siphoviridae	DNA	156	PC	5	0.88	0	1
Bacillaceae	family	Bacillales	order	Siphoviridae	DNA	156	PC	6	0.845	0	1
Bacillaceae	family	Bacillales	order	Siphoviridae	DNA	156	Domains	0	0.595	0.15	0.8
Bacillales	order	Bacilli	class	none	DNA	547	DNA	2	0.904	0.88	0.79
Bacillales	order	Bacilli	class	none	DNA	547	DNA	6	1	1	0.99
Bacillales	order	Bacilli	class	none	DNA	547	DNA	9	0.998	0.96	0.99
Bacillales	order	Bacilli	class	none	DNA	547	AA	3	0.998	0.97	0.99
Bacillales	order	Bacilli	class	none	DNA	547	AA	4	0.999	0.84	1
Bacillales	order	Bacilli	class	none	DNA	547	PC	5	0.994	0.9	0.99
Bacillales	order	Bacilli	class	none	DNA	547	PC	6	0.996	0.86	1
Bacillales	order	Bacilli	class	none	DNA	547	Domains	0	0.965	0.96	0.94
Bacillales	order	Firmicutes	phylum	Siphoviridae	DNA	136	DNA	2	0.755	0.65	0.8
Bacillales	order	Firmicutes	phylum	Siphoviridae	DNA	136	DNA	6	0.93	0.95	0.25
Bacillales	order	Firmicutes	phylum	Siphoviridae	DNA	136	DNA	9	0.87	0.75	0.8
Bacillales	order	Firmicutes	phylum	Siphoviridae	DNA	136	AA	3	0.905	0.9	0.6
Bacillales	order	Firmicutes	phylum	Siphoviridae	DNA	136	AA	4	0.862	0	1
Bacillales	order	Firmicutes	phylum	Siphoviridae	DNA	136	PC	5	0.538	0.35	0.65
Bacillales	order	Firmicutes	phylum	Siphoviridae	DNA	136	PC	6	0.585	0.05	1
Bacillales	order	Firmicutes	phylum	Siphoviridae	DNA	136	Domains	0	0.865	0.95	0.35
Bacillales	order	Firmicutes	phylum	Myoviridae	DNA	421	DNA	2	0.692	0.79	0.65
Bacillales	order	Firmicutes	phylum	Myoviridae	DNA	421	DNA	6	0.955	0.84	0.9
Bacillales	order	Firmicutes	phylum	Myoviridae	DNA	421	DNA	9	0.916	0.89	0.85
Bacillales	order	Firmicutes	phylum	Myoviridae	DNA	421	AA	3	0.824	0.16	0.95
Bacillales	order	Firmicutes	phylum	Myoviridae	DNA	421	AA	4	0.476	0.16	1
Bacillales	order	Firmicutes	phylum	Myoviridae	DNA	421	PC	5	0.295	0.21	0.75
Bacillales	order	Firmicutes	phylum	Myoviridae	DNA	421	PC	6	0.284	0.16	0.75
Bacillales	order	Firmicutes	phylum	Myoviridae	DNA	421	Domains	0	0.805	0.42	0.85
Bacillales	order	Firmicutes	phylum	Podoviridae	DNA	432	DNA	2	0.441	0.53	0.56
Bacillales	order	Firmicutes	phylum	Podoviridae	DNA	432	DNA	6	0.875	0.65	0.94
Bacillales	order	Firmicutes	phylum	Podoviridae	DNA	432	DNA	9	0.886	0.65	1
Bacillales	order	Firmicutes	phylum	Podoviridae	DNA	432	AA	3	0.743	0.53	0.94
Bacillales	order	Firmicutes	phylum	Podoviridae	DNA	432	AA	4	0.64	0.18	1
Bacillales	order	Firmicutes	phylum	Podoviridae	DNA	432	PC	5	0.853	0.76	0.88
Bacillales	order	Firmicutes	phylum	Podoviridae	DNA	432	PC	6	0.768	0.29	1
Bacillales	order	Firmicutes	phylum	Podoviridae	DNA	432	Domains	0	0.754	0.53	1
Enterobacterales	order	Gammaproteobacteria	class	none	DNA	771	DNA	2	0.728	0.57	0.87
Enterobacterales	order	Gammaproteobacteria	class	none	DNA	771	DNA	6	0.997	0.98	0.95
Enterobacterales	order	Gammaproteobacteria	class	none	DNA	771	DNA	9	0.995	0.98	0.97
Enterobacterales	order	Gammaproteobacteria	class	none	DNA	771	AA	3	0.993	0.96	0.96
Enterobacterales	order	Gammaproteobacteria	class	none	DNA	771	AA	4	0.988	0.96	0.94
Enterobacterales	order	Gammaproteobacteria	class	none	DNA	771	PC	5	0.979	0.94	0.93
Enterobacterales	order	Gammaproteobacteria	class	none	DNA	771	PC	6	0.991	0.97	0.95
Enterobacterales	order	Gammaproteobacteria	class	none	DNA	771	Domains	0	0.961	0.93	0.93
Enterobacterales	order	Proteobacteria	phylum	Siphoviridae	DNA	429	DNA	2	0.839	0.89	0.65
Enterobacterales	order	Proteobacteria	phylum	Siphoviridae	DNA	429	DNA	6	0.997	1	0.9
Enterobacterales	order	Proteobacteria	phylum	Siphoviridae	DNA	429	DNA	9	0.995	1	0.85
Enterobacterales	order	Proteobacteria	phylum	Siphoviridae	DNA	429	AA	3	0.871	1	0.3
Enterobacterales	order	Proteobacteria	phylum	Siphoviridae	DNA	429	AA	4	0.732	0.95	0
Enterobacterales	order	Proteobacteria	phylum	Siphoviridae	DNA	429	PC	5	0.892	0.95	0.45
Enterobacterales	order	Proteobacteria	phylum	Siphoviridae	DNA	429	PC	6	0.663	1	0.1
Enterobacterales	order	Proteobacteria	phylum	Siphoviridae	DNA	429	Domains	0	0.661	0.74	0.6
Enterobacterales	order	Proteobacteria	phylum	Podoviridae	DNA	421	DNA	2	0.782	0.45	1
Enterobacterales	order	Proteobacteria	phylum	Podoviridae	DNA	421	DNA	6	0.875	0.9	0.7
Enterobacterales	order	Proteobacteria	phylum	Podoviridae	DNA	421	DNA	9	0.928	0.95	0.75
Enterobacterales	order	Proteobacteria	phylum	Podoviridae	DNA	421	AA	3	0.815	1	0.2
Enterobacterales	order	Proteobacteria	phylum	Podoviridae	DNA	421	AA	4	0.82	1	0.1
Enterobacterales	order	Proteobacteria	phylum	Podoviridae	DNA	421	PC	5	0.52	0.95	0.15
Enterobacterales	order	Proteobacteria	phylum	Podoviridae	DNA	421	PC	6	0.793	1	0
Enterobacterales	order	Proteobacteria	phylum	Podoviridae	DNA	421	Domains	0	0.79	0.85	0.55
Enterobacterales	order	Proteobacteria	phylum	Myoviridae	DNA	426	DNA	2	0.59	0.3	1
Enterobacterales	order	Proteobacteria	phylum	Myoviridae	DNA	426	DNA	6	1	1	1
Enterobacterales	order	Proteobacteria	phylum	Myoviridae	DNA	426	DNA	9	0.985	0.9	0.95
Enterobacterales	order	Proteobacteria	phylum	Myoviridae	DNA	426	AA	3	0.779	0.75	0.7
Enterobacterales	order	Proteobacteria	phylum	Myoviridae	DNA	426	AA	4	0.66	0.95	0.05
Enterobacterales	order	Proteobacteria	phylum	Myoviridae	DNA	426	PC	5	0.635	0.95	0.15
Enterobacterales	order	Proteobacteria	phylum	Myoviridae	DNA	426	PC	6	0.688	1	0
Enterobacterales	order	Proteobacteria	phylum	Myoviridae	DNA	426	Domains	0	0.58	0.5	0.6
Lactobacillales	order	Bacilli	class	none	DNA	547	DNA	2	0.818	0.74	0.86
Lactobacillales	order	Bacilli	class	none	DNA	547	DNA	6	1	1	1
Lactobacillales	order	Bacilli	class	none	DNA	547	DNA	9	1	0.99	1
Lactobacillales	order	Bacilli	class	none	DNA	547	AA	3	0.999	0.99	0.99
Lactobacillales	order	Bacilli	class	none	DNA	547	AA	4	0.997	1	0.96
Lactobacillales	order	Bacilli	class	none	DNA	547	PC	5	0.998	0.97	0.96
Lactobacillales	order	Bacilli	class	none	DNA	547	PC	6	0.999	1	0.96
Lactobacillales	order	Bacilli	class	none	DNA	547	Domains	0	0.991	0.91	0.99
Lactobacillales	order	Firmicutes	phylum	Siphoviridae	DNA	86	DNA	2	0.755	0.25	0.9
Lactobacillales	order	Firmicutes	phylum	Siphoviridae	DNA	86	DNA	6	0.995	0.4	1
Lactobacillales	order	Firmicutes	phylum	Siphoviridae	DNA	86	DNA	9	0.888	0.9	0.75
Lactobacillales	order	Firmicutes	phylum	Siphoviridae	DNA	86	AA	3	0.818	0.95	0.55
Lactobacillales	order	Firmicutes	phylum	Siphoviridae	DNA	86	AA	4	0.772	1	0
Lactobacillales	order	Firmicutes	phylum	Siphoviridae	DNA	86	PC	5	0.628	0.85	0.2
Lactobacillales	order	Firmicutes	phylum	Siphoviridae	DNA	86	PC	6	0.79	1	0
Lactobacillales	order	Firmicutes	phylum	Siphoviridae	DNA	86	Domains	0	0.762	0.6	0.75
Lactobacillales	order	Firmicutes	phylum	Myoviridae	DNA	425	DNA	2	0.962	0.93	0.85
Lactobacillales	order	Firmicutes	phylum	Myoviridae	DNA	425	DNA	6	1	1	0.69
Lactobacillales	order	Firmicutes	phylum	Myoviridae	DNA	425	DNA	9	0.978	1	0.69
Lactobacillales	order	Firmicutes	phylum	Myoviridae	DNA	425	AA	3	1	1	0.69
Lactobacillales	order	Firmicutes	phylum	Myoviridae	DNA	425	AA	4	0.995	1	0.38
Lactobacillales	order	Firmicutes	phylum	Myoviridae	DNA	425	PC	5	0.989	1	0.62
Lactobacillales	order	Firmicutes	phylum	Myoviridae	DNA	425	PC	6	0.945	1	0.38
Lactobacillales	order	Firmicutes	phylum	Myoviridae	DNA	425	Domains	0	0.885	0.93	0.46
Pseudomonadales	order	Gammaproteobacteria	class	none	DNA	402	DNA	2	0.781	0.98	0.76
Pseudomonadales	order	Gammaproteobacteria	class	none	DNA	402	DNA	6	0.991	0.92	0.98
Pseudomonadales	order	Gammaproteobacteria	class	none	DNA	402	DNA	9	0.981	0.94	0.86
Pseudomonadales	order	Gammaproteobacteria	class	none	DNA	402	AA	3	0.982	0.92	0.9
Pseudomonadales	order	Gammaproteobacteria	class	none	DNA	402	AA	4	0.98	0.94	0.92
Pseudomonadales	order	Gammaproteobacteria	class	none	DNA	402	PC	5	0.967	0.82	0.9
Pseudomonadales	order	Gammaproteobacteria	class	none	DNA	402	PC	6	0.953	0.9	0.8
Pseudomonadales	order	Gammaproteobacteria	class	none	DNA	402	Domains	0	0.992	0.92	0.96
Pseudomonadales	order	Proteobacteria	phylum	Myoviridae	DNA	293	DNA	2	0.9	0.9	0.63
Pseudomonadales	order	Proteobacteria	phylum	Myoviridae	DNA	293	DNA	6	0.939	0.95	0.47
Pseudomonadales	order	Proteobacteria	phylum	Myoviridae	DNA	293	DNA	9	0.939	0.95	0.32
Pseudomonadales	order	Proteobacteria	phylum	Myoviridae	DNA	293	AA	3	0.747	1	0.05
Pseudomonadales	order	Proteobacteria	phylum	Myoviridae	DNA	293	AA	4	0.739	1	0
Pseudomonadales	order	Proteobacteria	phylum	Myoviridae	DNA	293	PC	5	0.508	0.9	0
Pseudomonadales	order	Proteobacteria	phylum	Myoviridae	DNA	293	PC	6	0.542	1	0
Pseudomonadales	order	Proteobacteria	phylum	Myoviridae	DNA	293	Domains	0	0.734	0.85	0.11
Pseudomonadales	order	Proteobacteria	phylum	Podoviridae	DNA	302	DNA	2	0.918	0.8	0.95
Pseudomonadales	order	Proteobacteria	phylum	Podoviridae	DNA	302	DNA	6	1	0.6	1
Pseudomonadales	order	Proteobacteria	phylum	Podoviridae	DNA	302	DNA	9	0.992	0.4	1
Pseudomonadales	order	Proteobacteria	phylum	Podoviridae	DNA	302	AA	3	0.938	0.7	0.95
Pseudomonadales	order	Proteobacteria	phylum	Podoviridae	DNA	302	AA	4	0.768	0.85	0.45
Pseudomonadales	order	Proteobacteria	phylum	Podoviridae	DNA	302	PC	5	0.662	0.85	0.35
Pseudomonadales	order	Proteobacteria	phylum	Podoviridae	DNA	302	PC	6	0.47	0.95	0
Pseudomonadales	order	Proteobacteria	phylum	Podoviridae	DNA	302	Domains	0	0.373	0.7	0.2
Pseudomonadales	order	Proteobacteria	phylum	Siphoviridae	DNA	309	DNA	2	0.905	0.9	0.84
Pseudomonadales	order	Proteobacteria	phylum	Siphoviridae	DNA	309	DNA	6	0.879	0.8	0.68
Pseudomonadales	order	Proteobacteria	phylum	Siphoviridae	DNA	309	DNA	9	0.963	0.95	0.68
Pseudomonadales	order	Proteobacteria	phylum	Siphoviridae	DNA	309	AA	3	0.832	0.8	0.53
Pseudomonadales	order	Proteobacteria	phylum	Siphoviridae	DNA	309	AA	4	0.829	1	0
Pseudomonadales	order	Proteobacteria	phylum	Siphoviridae	DNA	309	PC	5	0.755	0.95	0
Pseudomonadales	order	Proteobacteria	phylum	Siphoviridae	DNA	309	PC	6	0.755	1	0
Pseudomonadales	order	Proteobacteria	phylum	Siphoviridae	DNA	309	Domains	0	0.603	1	0.26
Cyanobacteria	phylum	Bacteria	superkingdom	none	DNA	208	DNA	2	0.916	0.85	0.81
Cyanobacteria	phylum	Bacteria	superkingdom	none	DNA	208	DNA	6	0.996	0.96	0.96
Cyanobacteria	phylum	Bacteria	superkingdom	none	DNA	208	DNA	9	0.99	0.92	0.92
Cyanobacteria	phylum	Bacteria	superkingdom	none	DNA	208	AA	3	0.994	0.92	0.96
Cyanobacteria	phylum	Bacteria	superkingdom	none	DNA	208	AA	4	0.982	0.69	1
Cyanobacteria	phylum	Bacteria	superkingdom	none	DNA	208	PC	5	0.987	0.88	0.96
Cyanobacteria	phylum	Bacteria	superkingdom	none	DNA	208	PC	6	0.984	0.69	1
Cyanobacteria	phylum	Bacteria	superkingdom	none	DNA	208	Domains	0	0.99	0.92	0.96
Cyanobacteria	phylum	Bacteria	kingdom	Podoviridae	DNA	156	DNA	2	0.675	0.55	0.85
Cyanobacteria	phylum	Bacteria	kingdom	Podoviridae	DNA	156	DNA	6	0.882	1	0.4
Cyanobacteria	phylum	Bacteria	kingdom	Podoviridae	DNA	156	DNA	9	0.895	0.9	0.8
Cyanobacteria	phylum	Bacteria	kingdom	Podoviridae	DNA	156	AA	3	0.988	1	0.8
Cyanobacteria	phylum	Bacteria	kingdom	Podoviridae	DNA	156	AA	4	0.895	0.7	0.9
Cyanobacteria	phylum	Bacteria	kingdom	Podoviridae	DNA	156	PC	5	0.952	0.95	0.85
Cyanobacteria	phylum	Bacteria	kingdom	Podoviridae	DNA	156	PC	6	0.805	0.6	1
Cyanobacteria	phylum	Bacteria	kingdom	Podoviridae	DNA	156	Domains	0	0.772	0.95	0.25
Cyanobacteria	phylum	Bacteria	kingdom	Myoviridae	DNA	104	DNA	2	0.935	0.9	1
Cyanobacteria	phylum	Bacteria	kingdom	Myoviridae	DNA	104	DNA	6	1	1	1
Cyanobacteria	phylum	Bacteria	kingdom	Myoviridae	DNA	104	DNA	9	1	0.85	1
Cyanobacteria	phylum	Bacteria	kingdom	Myoviridae	DNA	104	AA	3	1	0.95	1
Cyanobacteria	phylum	Bacteria	kingdom	Myoviridae	DNA	104	AA	4	1	1	0.55
Cyanobacteria	phylum	Bacteria	kingdom	Myoviridae	DNA	104	PC	5	1	1	1
Cyanobacteria	phylum	Bacteria	kingdom	Myoviridae	DNA	104	PC	6	1	1	0.9
Cyanobacteria	phylum	Bacteria	kingdom	Myoviridae	DNA	104	Domains	0	0.95	0.95	0
Firmicutes	phylum	Bacteria	superkingdom	none	DNA	990	DNA	2	0.914	0.84	0.94
Firmicutes	phylum	Bacteria	superkingdom	none	DNA	990	DNA	6	0.999	0.99	0.98
Firmicutes	phylum	Bacteria	superkingdom	none	DNA	990	DNA	9	0.999	0.96	0.99
Firmicutes	phylum	Bacteria	superkingdom	none	DNA	990	AA	3	1	1	0.98
Firmicutes	phylum	Bacteria	superkingdom	none	DNA	990	AA	4	0.998	0.96	0.97
Firmicutes	phylum	Bacteria	superkingdom	none	DNA	990	PC	5	0.999	0.99	0.98
Firmicutes	phylum	Bacteria	superkingdom	none	DNA	990	PC	6	0.998	1	0.96
Firmicutes	phylum	Bacteria	superkingdom	none	DNA	990	Domains	0	0.999	0.98	1
Firmicutes	phylum	Bacteria	kingdom	Siphoviridae	DNA	416	DNA	2	0.628	0.7	0.4
Firmicutes	phylum	Bacteria	kingdom	Siphoviridae	DNA	416	DNA	6	0.985	1	0.85
Firmicutes	phylum	Bacteria	kingdom	Siphoviridae	DNA	416	DNA	9	0.992	1	0.85
Firmicutes	phylum	Bacteria	kingdom	Siphoviridae	DNA	416	AA	3	0.992	0.95	0.95
Firmicutes	phylum	Bacteria	kingdom	Siphoviridae	DNA	416	AA	4	0.987	1	0.7
Firmicutes	phylum	Bacteria	kingdom	Siphoviridae	DNA	416	PC	5	0.982	0.95	0.85
Firmicutes	phylum	Bacteria	kingdom	Siphoviridae	DNA	416	PC	6	0.987	1	0.75
Firmicutes	phylum	Bacteria	kingdom	Siphoviridae	DNA	416	Domains	0	0.857	0.55	0.95
Firmicutes	phylum	Bacteria	kingdom	Podoviridae	DNA	435	DNA	2	0.842	0.7	1
Firmicutes	phylum	Bacteria	kingdom	Podoviridae	DNA	435	DNA	6	0.992	0.9	1
Firmicutes	phylum	Bacteria	kingdom	Podoviridae	DNA	435	DNA	9	0.979	0.8	1
Firmicutes	phylum	Bacteria	kingdom	Podoviridae	DNA	435	AA	3	0.987	0.85	1
Firmicutes	phylum	Bacteria	kingdom	Podoviridae	DNA	435	AA	4	0.939	0.9	0.89
Firmicutes	phylum	Bacteria	kingdom	Podoviridae	DNA	435	PC	5	0.942	0.85	0.89
Firmicutes	phylum	Bacteria	kingdom	Podoviridae	DNA	435	PC	6	0.934	0.9	0.89
Firmicutes	phylum	Bacteria	kingdom	Podoviridae	DNA	435	Domains	0	0.995	0.9	0.95
Firmicutes	phylum	Bacteria	kingdom	Myoviridae	DNA	435	DNA	2	0.605	0.6	0.45
Firmicutes	phylum	Bacteria	kingdom	Myoviridae	DNA	435	DNA	6	0.967	0.9	1
Firmicutes	phylum	Bacteria	kingdom	Myoviridae	DNA	435	DNA	9	0.92	0.9	0.9
Firmicutes	phylum	Bacteria	kingdom	Myoviridae	DNA	435	AA	3	0.997	0.95	1
Firmicutes	phylum	Bacteria	kingdom	Myoviridae	DNA	435	AA	4	0.97	0.9	0.95
Firmicutes	phylum	Bacteria	kingdom	Myoviridae	DNA	435	PC	5	0.995	0.9	1
Firmicutes	phylum	Bacteria	kingdom	Myoviridae	DNA	435	PC	6	0.99	0.9	0.95
Firmicutes	phylum	Bacteria	kingdom	Myoviridae	DNA	435	Domains	0	0.962	0.95	0.7
Proteobacteria	phylum	Bacteria	superkingdom	none	DNA	985	DNA	2	0.783	0.8	0.72
Proteobacteria	phylum	Bacteria	superkingdom	none	DNA	985	DNA	6	0.992	0.99	0.99
Proteobacteria	phylum	Bacteria	superkingdom	none	DNA	985	DNA	9	0.994	0.98	1
Proteobacteria	phylum	Bacteria	superkingdom	none	DNA	985	AA	3	0.994	0.97	0.99
Proteobacteria	phylum	Bacteria	superkingdom	none	DNA	985	AA	4	0.992	0.9	1
Proteobacteria	phylum	Bacteria	superkingdom	none	DNA	985	PC	5	0.983	0.94	0.98
Proteobacteria	phylum	Bacteria	superkingdom	none	DNA	985	PC	6	0.99	0.93	0.99
Proteobacteria	phylum	Bacteria	superkingdom	none	DNA	985	Domains	0	0.988	0.98	1
Proteobacteria	phylum	Bacteria	kingdom	Siphoviridae	DNA	435	DNA	2	0.638	0.35	0.9
Proteobacteria	phylum	Bacteria	kingdom	Siphoviridae	DNA	435	DNA	6	0.91	0.8	0.9
Proteobacteria	phylum	Bacteria	kingdom	Siphoviridae	DNA	435	DNA	9	0.948	0.6	0.95
Proteobacteria	phylum	Bacteria	kingdom	Siphoviridae	DNA	435	AA	3	0.893	0.55	1
Proteobacteria	phylum	Bacteria	kingdom	Siphoviridae	DNA	435	AA	4	0.575	0.45	0.95
Proteobacteria	phylum	Bacteria	kingdom	Siphoviridae	DNA	435	PC	5	0.775	0.4	1
Proteobacteria	phylum	Bacteria	kingdom	Siphoviridae	DNA	435	PC	6	0.62	0.4	1
Proteobacteria	phylum	Bacteria	kingdom	Siphoviridae	DNA	435	Domains	0	0.822	0.9	0.7
Proteobacteria	phylum	Bacteria	kingdom	Podoviridae	DNA	432	DNA	2	0.852	0.85	0.8
Proteobacteria	phylum	Bacteria	kingdom	Podoviridae	DNA	432	DNA	6	0.915	0.85	0.75
Proteobacteria	phylum	Bacteria	kingdom	Podoviridae	DNA	432	DNA	9	0.948	0.75	0.85
Proteobacteria	phylum	Bacteria	kingdom	Podoviridae	DNA	432	AA	3	0.948	0.8	0.9
Proteobacteria	phylum	Bacteria	kingdom	Podoviridae	DNA	432	AA	4	0.93	0.55	1
Proteobacteria	phylum	Bacteria	kingdom	Podoviridae	DNA	432	PC	5	0.748	0.7	0.75
Proteobacteria	phylum	Bacteria	kingdom	Podoviridae	DNA	432	PC	6	0.83	0.6	0.95
Proteobacteria	phylum	Bacteria	kingdom	Podoviridae	DNA	432	Domains	0	0.937	0.85	0.75
Proteobacteria	phylum	Bacteria	kingdom	Myoviridae	DNA	434	DNA	2	0.571	0.55	0.53
Proteobacteria	phylum	Bacteria	kingdom	Myoviridae	DNA	434	DNA	6	0.855	0.85	0.74
Proteobacteria	phylum	Bacteria	kingdom	Myoviridae	DNA	434	DNA	9	0.813	0.9	0.79
Proteobacteria	phylum	Bacteria	kingdom	Myoviridae	DNA	434	AA	3	0.884	0.85	0.79
Proteobacteria	phylum	Bacteria	kingdom	Myoviridae	DNA	434	AA	4	0.829	0.35	0.89
Proteobacteria	phylum	Bacteria	kingdom	Myoviridae	DNA	434	PC	5	0.871	0.85	0.84
Proteobacteria	phylum	Bacteria	kingdom	Myoviridae	DNA	434	PC	6	0.926	0.7	1
Proteobacteria	phylum	Bacteria	kingdom	Myoviridae	DNA	434	Domains	0	0.911	0.75	1
